# Supplementary material for: Validation of the Application of Solid Contact Ion-Selective Electrode for Off-Body Sweat Ion Monitoring
Source: Biosensors (Basel). 2022 Apr 9;12(4):229. doi: 10.3390/bios12040229 (PMC9026306; doi:10.3390/bios12040229)
Supplement: Supplementary file 1 [file biosensors-12-00229-s001.zip › biosensors-1656456-supplementary.pdf]

# Validation of the Application of Solid Contact Ion-Selective Electrode for Off-Body Sweat Ion Monitoring

Huixin Liu <sup>1,2,3</sup>, Zhen Gu <sup>4</sup>, Yuan Liu <sup>5</sup>, Xinxin Xiao <sup>6,\*</sup> and Guangli Xiu <sup>1,2,3,\*</sup>

<sup>1</sup> Shanghai Environmental Protection Key Laboratory for Environmental Standard and Risk Management of Chemical Pollutants, School of Resources & Environmental Engineering, East China University of Science & Technology, Shanghai 200237, China; liuhuixin@mail.ecust.edu.cn

<sup>2</sup> State Environmental Protection Key Laboratory of Environmental Risk Assessment and Control on Chemical Processes, School of Resources & Environmental Engineering, East China University of Science & Technology, Shanghai 200237, China

<sup>3</sup> Shanghai Institute of Pollution Control and Ecological Security, Shanghai 200092, China

<sup>4</sup> Department of Automation, School of Information Science and Engineering, East China University of Science & Technology, Shanghai 200237, China; guzhen@ecust.edu.cn

<sup>5</sup> COFCO Corporation, Chao Yang Men South St. No. 8, Beijing 100020, China; liuyuan1@cofco.com

<sup>6</sup> Department of Chemistry, Technical University of Denmark, 2800 Kongens Lyngby, Denmark

\* Correspondence: xixiao@kemi.dtu.dk (X.X.); xiugl@ecust.edu.cn (G.X.)

**Table S1.** The specific health information of volunteers.

| <i>Volunteer</i> | <i>Age</i> | <i>Gender</i> | <i>Height (m)</i> | <i>Weight (kg)</i> | <i>BMI (kg /m<sup>2</sup>)</i> | <i>Health Status</i> |
|------------------|------------|---------------|-------------------|--------------------|--------------------------------|----------------------|
| A                | 24         | Male          | 1.75              | 73                 | 23.57                          | Good                 |
| B                | 26         | Male          | 1.80              | 83                 | 25.62                          | Good                 |
| C                | 26         | Male          | 1.73              | 81                 | 27.06                          | Good                 |
| D                | 24         | Male          | 1.82              | 69                 | 20.83                          | Good                 |
| E                | 24         | Male          | 1.82              | 74                 | 22.34                          | Good                 |
| F                | 24         | Male          | 1.71              | 75                 | 25.65                          | Good                 |
| G                | 24         | Male          | 1.73              | 77                 | 25.73                          | Good                 |
| H                | 22         | Male          | 1.70              | 72                 | 24.91                          | Good                 |

**Table S2.** The ingredient list of chosen mineral drink as described in the label.

| <b>Ingredient</b> | <b>Content per 100 mL</b> |
|-------------------|---------------------------|
| Sodium            | 49 (mg)                   |
| Potassium         | 21 (mg)                   |
| Energy            | 111 (kJ)                  |
| Protein           | 0 (g)                     |
| Fat               | 0 (g)                     |
| Carbohydrate      | 6.5 (g)                   |
